# Supplementary material for: A stable porphyrinic metal–organic framework pore-functionalized by high-density carboxylic groups for proton conduction
Source: Royal Society of Chemistry journal article supplement (doi:10.1039/c7ta03917d), 2017-01-01
Supplement: c7ta03917d1.pdf [file c7ta03917d1.pdf]

## **Supplementary Information**

### **A stable porphyrinic metal-organic framework pore-functionalized by high-density carboxylic groups for proton conduction**

Hao Wu, Fan Yang, Xiu-Liang Lv, Bin Wang, Yong-Zheng Zhang, Min-Jian Zhao\*  
and Jian-Rong Li\*

*Beijing Key Laboratory for Green Catalysis and Separation and Department of  
Chemistry and Chemical Engineering, College of Environmental and Energy  
Engineering, Beijing University of Technology, Beijing 100124, P. R. China*

*Fax: (+86)-10-67392332*

*E-mail: jrli@bjut.edu.cn*

## **Table of Contents**

|      |                                             |
|------|---------------------------------------------|
| I.   | Materials and general characterizations     |
| II.  | Synthesis                                   |
| III. | Single-crystal X-ray diffraction for BUT-83 |
| IV.  | Activation of the BUT-83 sample             |
| V.   | Proton conduction measurement               |
| VI.  | Supplementary tables and figures            |
| VII. | References                                  |

## **I. Materials and general characterizations**

All general reagents and solvents (AR grade) were commercially available and used as received without further purification. 4-Pyridinecarboxaldehyde and methyl 4-formylbenzoate were purchased from Bide Pharmatech Ltd.  $^1\text{H}$  NMR spectra were measured on Bruker Avance 400 MHz with tetramethylsilane as the internal standard. FT-IR spectra were recorded on an IRAffinity-1 instrument. The powder X-ray diffraction (PXRD) patterns were recorded on a Rigaku Smartlab3 X-ray Powder Diffractometer equipped with a Cu sealed tube ( $\lambda = 1.54178 \text{ \AA}$ ) at room temperature. Simulation of the PXRD patterns were carried out by the single-crystal data and the diffraction-crystal module of the Mercury program available free of charge via the Internet at <http://www.ccdc.cam.ac.uk/mercury/>. TGA datas were obtained on a TGA-60 (SHIMADZU) thermogravimetric analyzer from 30 to 800 °C at a heating rate of 10 °C min<sup>-1</sup> under air atmosphere. Gas adsorption isotherms were measured by the volumetric method using a Micromeritics ASAP2020 surface area and pore analyzer.

## II. Synthesis

### Synthesis of [5,15-di[4-carboxyphenyl]-10,20-di[pyridyl]porphyrin] (H<sub>2</sub>DCDPP)

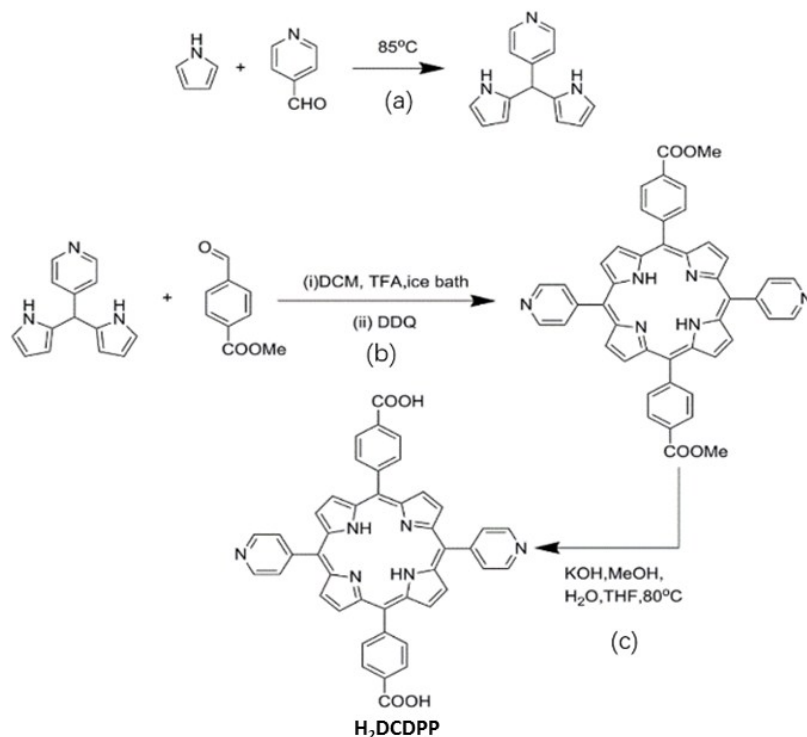

**Scheme 1.** Synthetic procedure of H<sub>2</sub>DCDPP.

#### (a) 5-(4-Pyridyl)dipyrromethane

A mixture of 4-pyridinecarboxaldehyde (3.0 mL, 31.9 mmol) and pyrrole (20.00 mL, 0.29 mol) was stirred at 85 °C for 8 hours in nitrogen atmosphere. The reaction mixture was dried by evaporation and chromatographed (silica, in dichloromethane/ethyl acetate) from 100/0 to 90/10) affording brown solid. Recrystallization (in ethyl acetate/petroleum ether) afforded 3.557 g of pale yellow crystals. Yield: 65.4%. <sup>1</sup>H NMR (400 MHz,  $\delta$ -CDCl<sub>3</sub>): 5.45 (s, 1H), 5.88 (m, 2H), 6.18 (d, 2H), 6.75 (m, 2H), 7.14 (d, 2H), 8.1 (m, 2H), 8.54 (d, 2H).

**(b) [5,15-Di[pyridyl]-10,20-di[4-carboxymethylphenyl]]porphyrin (H<sub>2</sub>DCOOMeDPP)**

5-(4-Pyridyl)dipyrromethane (1.000 g, 4.48 mmol) and methyl 4-formylbenzoate (0.730 g, 4.48 mmol) were dissolved in 600 mL of anhydrous dichloromethane (DCM) under nitrogen atmosphere. The mixture was stirred in an ice bath and trifluoroacetic acid (TFA) (12 mL, 172.0 mmol) was dropwise added. After about 20 minutes, 2,3-dichloro-5,6-dicyano-1,4-benzoquinone (DDQ) (2.030 g, 8.96 mmol) was added, and then it was stirred at room temperature for another 3 hours. The organic phase was washed with saturated aqueous solution of NaHCO<sub>3</sub>, and dried over anhydrous Na<sub>2</sub>SO<sub>4</sub>. Purification by column chromatography (silica, trichloromethane/ethanol from 100/0 to 98/2) afforded a purple solid. Recrystallization (trichloromethane/hexane) afforded 533 mg of purple product. Yield: 32.4%. <sup>1</sup>H NMR (400 MHz,  $\delta$ -CDCl<sub>3</sub>): -2.87 (s, 2H), 4.12 (s, 6H), 8.29–8.32 (m, 8H), 8.47 (4H), 8.82–8.87 (m, 8H), 9.10 (d, 4H).

**(c) [5,15-Di[4-carboxyphenyl]-10,20-di[pyridyl]]porphyrin (H<sub>2</sub>DCDPP)**

H<sub>2</sub>DCOOMeDPP (500 mg, 0.126 mmol) was dissolved in tetrahydrofuran/methanol mixture (50 mL). Then, 20 mL 40% KOH solution (w/v) was added and the mixture was heated at 80 °C for 1 hour under stirring. After cooling to room temperature, the mixture was acidified with concentrated HCl aqueous solution (pH = 3) and then 100 mL water was added. The mixture was extracted with chloroform (100 mL  $\times$  3). The combining organic phase was washed with water 3 times (100 mL for each time) and dried over anhydrous Na<sub>2</sub>SO<sub>4</sub>, and filtered. The

solvent was removed and purple solid of H<sub>2</sub>DCDPP was obtained (253 mg, 55% yield). <sup>1</sup>H NMR (400 MHz, δ-DMSO-d<sub>6</sub>): -2.84 (s, 2H), 7.88(d, 4H), 8.05 (d, 4H), 8.17-8.23 (m, 8H), 8.37 (d, 4H), 8.96 (d, 4H), 13.0 (s, 2H).

### **Synthesis of [Co(DCDPP)]·5H<sub>2</sub>O (BUT-83)**

Co(NO<sub>3</sub>)<sub>2</sub>·6H<sub>2</sub>O (20 mg, 0.07 mmol), H<sub>2</sub>DCDPP (30 mg, 0.04 mmol), and tetrafluoroboric acid aqueous solution (48%, 1.5 mL) were ultrasonically dissolved in 10 mL of N,N'-dimethylformamide (DMF) in a 20 mL Pyrex vial and sealed. The vial was then heated at 80 °C for 72 h in an oven. After cooling to room temperature, the resulting deep purple crystals were harvested by filtration and washed with DMF and acetone, and then dried in air (yield 28 mg). For FT-IR and TGA spectra, see Figure S2 and S3, respectively.

### **Synthesis of Co(DpyDtolP)**

The ligand DpyDtolP and its Co-MOF (Co(DpyDtolP)) were synthesized according to literature method.<sup>7</sup> The PXRD is shown in Figure S7, confirming the success of obtaining this MOF and the phase purity of the as-synthesized sample.

### III. Single-crystal X-ray diffraction for BUT-83

The crystal data of BUT-83 was collected on a Rigaku Supernova CCD diffractometer equipped with a graphite-monochromatic enhanced Cu K $\alpha$  radiation ( $\lambda$  = 1.54184 Å) at 100 K. The datasets were corrected by empirical absorption correction using spherical harmonics, implemented in the *SCALE3 ABSPACK*<sup>1</sup> scaling algorithm. The structure of the MOF was solved by direct methods and refined by full-matrix least-squares on  $F^2$  using the *SHELXTL* software package.<sup>2</sup> Non-hydrogen atoms were refined with anisotropic displacement parameters during the final cycles. Hydrogen atoms of the ligands were calculated in ideal positions with isotropic displacement parameters. There are solvent accessible pore volumes in the crystals of the MOFs, which are occupied by highly disordered solvent molecules. No satisfactory disorder model for these solvent molecules could be assigned, and therefore the *SQUEEZE* program implemented in *PLATON*<sup>3</sup> was used to remove the electron densities of these disordered species. Thus, all of electron densities from free solvent molecules have been “squeezed” out. The details of structural refinement can be found in Table S1 and cif file.

**Table S1.** Crystal data and structure refinement for BUT-83.

| BUT-83 (CCDC: 1524129)                          | Before squeeze                                                  | After squeeze                                                   |
|-------------------------------------------------|-----------------------------------------------------------------|-----------------------------------------------------------------|
| Empirical formula                               | C <sub>44</sub> H <sub>26</sub> CoN <sub>6</sub> O <sub>4</sub> | C <sub>44</sub> H <sub>26</sub> CoN <sub>6</sub> O <sub>4</sub> |
| Formula weight                                  | 761.64                                                          | 761.64                                                          |
| Measurement temperature                         | 100 K                                                           | 100 K                                                           |
| Crystal system                                  | Trigonal                                                        | Trigonal                                                        |
| Space group                                     | $R\bar{3}$                                                      | $R\bar{3}$                                                      |
| <i>a</i> (Å)                                    | 33.0267(7)                                                      | 33.0267(7)                                                      |
| <i>b</i> (Å)                                    | 33.0267(7)                                                      | 33.0267(7)                                                      |
| <i>c</i> (Å)                                    | 9.1815(3)                                                       | 9.1815(3)                                                       |
| $\alpha$ (°)                                    | 90                                                              | 90                                                              |
| $\beta$ (°)                                     | 90                                                              | 90                                                              |
| $\gamma$ (°)                                    | 120                                                             | 120                                                             |
| Volume (Å <sup>3</sup> )                        | 8673.1(5)                                                       | 8673.1(5)                                                       |
| Z                                               | 9                                                               | 9                                                               |
| Calculated density(mg m <sup>-3</sup> )         | 1.312                                                           | 1.312                                                           |
| Absorption coefficient (mm <sup>-1</sup> )      | 0.496                                                           | 0.496                                                           |
| Independent reflections ( $I > 2\sigma(I)$ )    | 3792 [ $R_{\text{int}} = 0.0857$ ]                              | 3792 [ $R_{\text{int}} = 0.0857$ ]                              |
| <i>F</i> (000)                                  | 3519.0                                                          | 3519.0                                                          |
| Reflections collected                           | 10911                                                           | 10911                                                           |
| Crystal size (mm <sup>3</sup> )                 | 0.220 × 0.200 × 0.200                                           | 0.220 × 0.200 × 0.200                                           |
| $\theta$ range for data collection              | 4.268 to 52.494                                                 | 4.268 to 52.494                                                 |
| Data / restraints / parameters                  | 3792/12/250                                                     | 3792/12/250                                                     |
|                                                 | $-39 \leq h \leq 29$                                            | $-39 \leq h \leq 29$                                            |
| Limiting indices                                | $-36 \leq k \leq 38$                                            | $-36 \leq k \leq 38$                                            |
|                                                 | $-5 \leq l \leq 11$                                             | $-5 \leq l \leq 11$                                             |
| Goodness-of-fit on $F^2$                        | 1.037                                                           | 1.045                                                           |
| $R_I^a$ , $wR_2^b$ [ $I > 2\sigma(I)$ ]         | $R_1 = 0.0806$ , $wR_2 = 0.2239$                                | $R_1 = 0.0860$ , $wR_2 = 0.2375$                                |
| $R_I^a$ , $wR_2^b$ (all data)                   | $R_1 = 0.1193$ , $wR_2 = 0.2561$                                | $R_1 = 0.1208$ , $wR_2 = 0.2669$                                |
| Largest diff. peak and hole (e/Å <sup>3</sup> ) | 0.94/−0.95                                                      | 0.82/−0.97                                                      |

$$^a R_I = \Sigma(|F_0| - |F_C|) / \Sigma|F_0|.$$

$$^b wR_2 = [\Sigma w(|F_0|^2 - |F_C|^2)^2 / \Sigma w(F_0^2)]^{1/2}$$



#### **IV. Activation of the BUT-83 sample**

As-synthesized sample of BUT-83 was firstly soaked in fresh DMF for 24 h and then the extract was discarded. Fresh acetone was subsequently added, and the sample was allowed to stay in it for 8 h. This procedure was repeated three times over one day. After removing the acetone, the sample was dried under a dynamic vacuum ( $< 10^{-3}$  Torr) at room temperature for 3 h. Before adsorption measurement, the sample was further activated using the “outgas” function of the adsorption analyzer for 10 h at 70 °C. Before proton conductivity measurement, the sample was further dried for 10 h at 80 °C.

## V. Proton conduction measurement

The given MOF powder (*ca.* 80-100 mg) was pressed under 1000 kg cm<sup>-2</sup> pressure for 2 min to make a plate (length 1.0 cm and width 0.4 cm) (Fig. S1), then the thickness was measured by a micrometer. Both sides of the plate were attached to silver wires with silver paste and then put in a sealed double-walled glass chamber. The relative humidity (RH) inside the chamber was controlled through using standard saturated aqueous solutions of MgCl<sub>2</sub>, Mg(NO<sub>3</sub>)<sub>2</sub>, NaNO<sub>2</sub>, NaCl, KCl, and K<sub>2</sub>SO<sub>4</sub> (corresponding RH are about 33, 53, 65, 75, 85, and 97%, respectively).<sup>4</sup> The proton conductivities of the plate were then tested by a quasi-four-probe method in the chamber connected with a temperature controlled circulation water bath. The impedance measurements were carried out by using a Zennium electrochemical workstation with tuned frequencies from 1 Hz to 4 MHz and alternating potentials of 100 mV at 298-353 K. The bulk conductivities ( $\sigma$ , S cm<sup>-1</sup>) of the sample were estimated by using the following equation(1):

$$\sigma = L / (RA) \quad (1)$$

where L (cm) is the length of the block, R ( $\Omega$ ) is the impedance, and A (cm<sup>2</sup>) is the face area of the plate (A = thickness  $\times$  width). All measurements were repeated three times to get reproducible results.

The activation energy ( $E_a$ ) was determined by the equation (2) in previous literature.

$$\sigma = \frac{\sigma^0}{kT} \exp\left(\frac{-E_a}{kT}\right) \quad (2)$$

where  $\sigma^0$  is a constant,  $k$  is the Boltzmann constant,  $T$  is the temperature (K),  $E_a$  is the activation energy (eV).

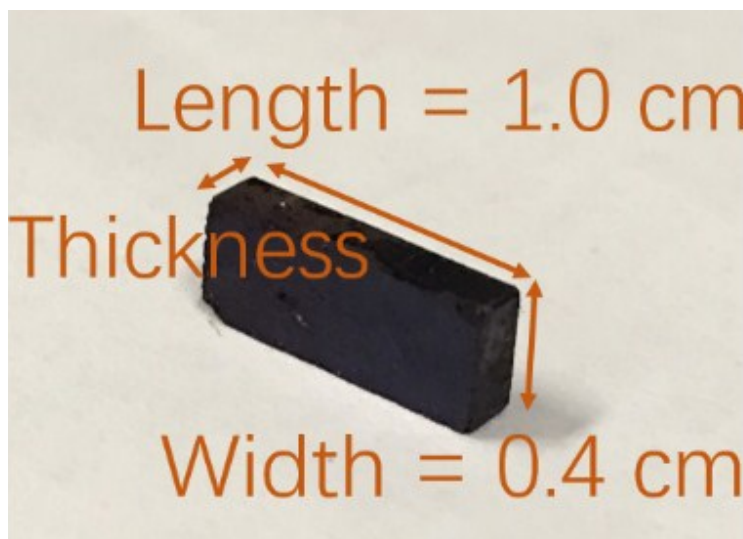

**Fig. S1.** Pressed sample for conductivity measurement.

The density of  $-\text{COOH}$  groups was calculated by the equation (3) below:

$$D_{-\text{COOH}} = n_{-\text{COOH}} / (V_{\text{pore}} \times M) \quad (3)$$

Where  $n_{-\text{COOH}}$  is the number of carboxylic acid groups per formula of the MOFs,  $V_{\text{pore}}$  is the pore volume ( $\text{cm}^3 \text{ g}^{-1}$ ) of MOFs,  $M$  is the molecular mass ( $\text{g mol}^{-1}$ ) of MOFs. The pore volume of BUT-83 ( $0.10 \text{ cm}^3 \text{ g}^{-1}$ ) was calculated from  $\text{N}_2$  uptake, and that of UiO-66- $(\text{COOH})_2$  ( $0.26 \text{ cm}^3 \text{ g}^{-1}$ ) was obtained from reported literature.<sup>5</sup> Due to the unavailable data for  $\text{N}_2$  uptake in MIL-53(Fe)- $(\text{COOH})_2$ , the pore volume of it used the approximate value of MIL-53(Al)- $(\text{OH})_2$  ( $0.42 \text{ cm}^3 \text{ g}^{-1}$ ) calculated by  $\text{H}_2\text{O}$  uptake.<sup>6</sup>

## VI. Supplementary tables and figures

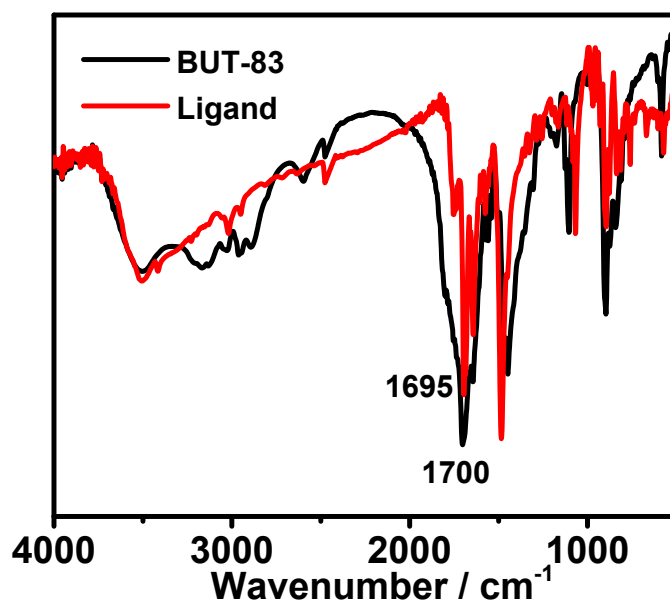

Fig. S2. FT-IR spectra of as-synthesized BUT-83 and its corresponding ligand.

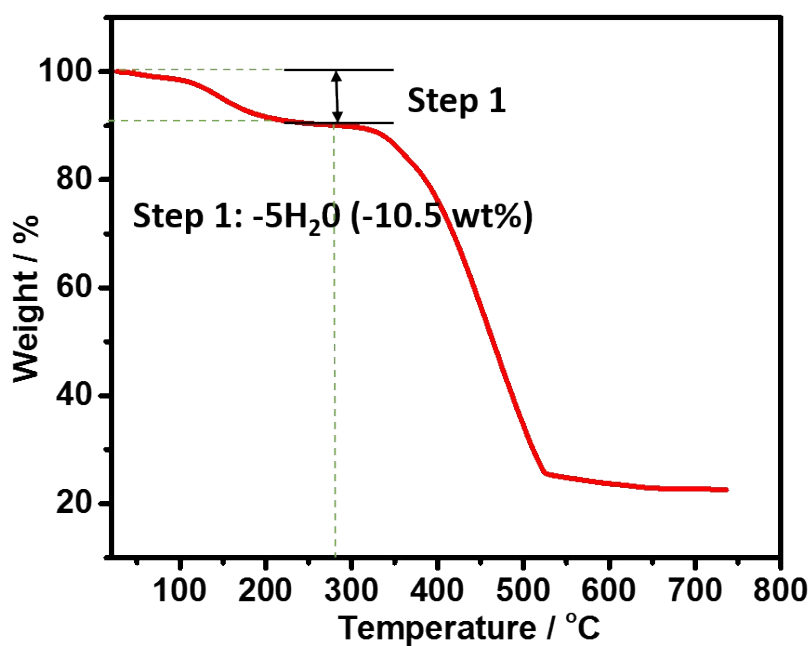

Fig. S3. TGA curve of BUT-83.

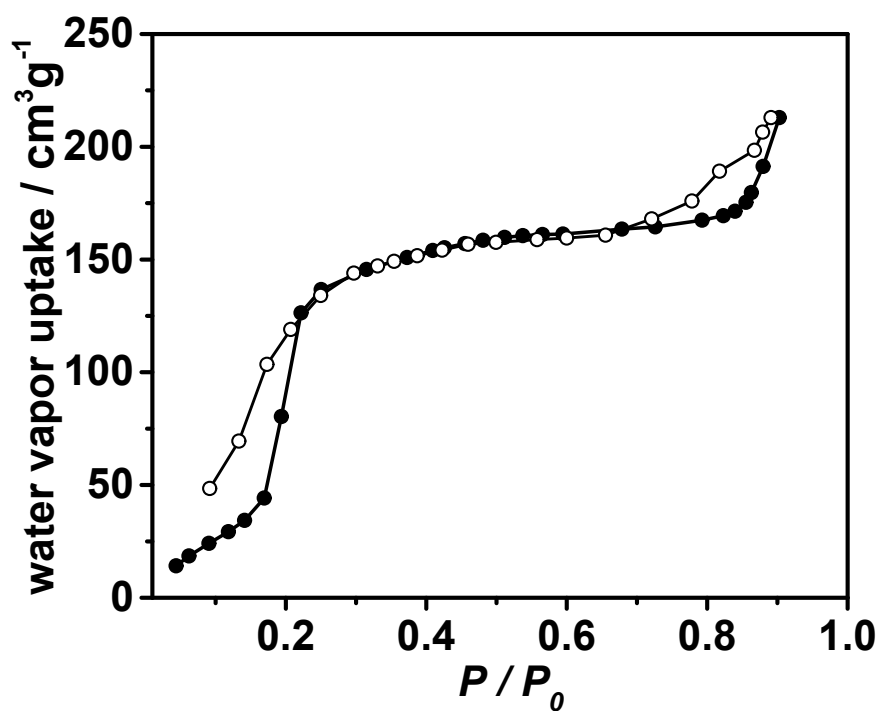

Fig. S4. Water vapor adsorption/desorption isotherms of BUT-83 at 298 K.

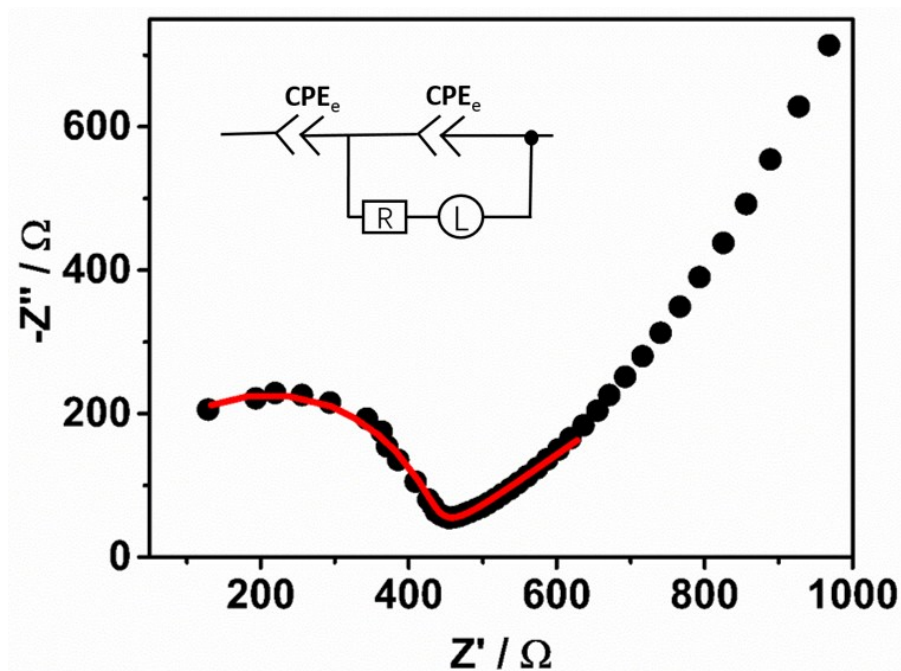

Fig. S5. Nyquist plots (black circles) and fitted line (red curve) of BUT-83 at 80 °C and 97% RH (the inset shows schematic representation of an equivalent circuit).

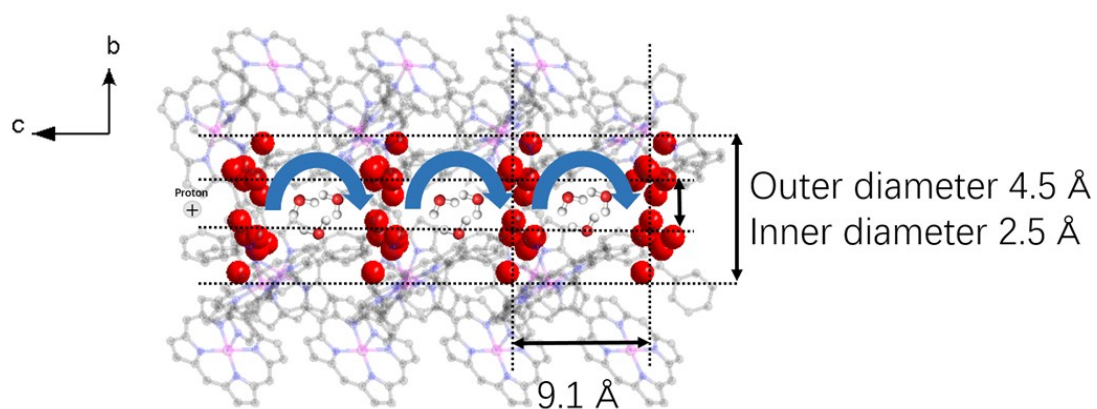

**Fig. S6.** Proposed Grotthuss proton hopping pathway in BUT-83 (color code: Co, magenta; N, blue; C, black; H, white; and O, red).

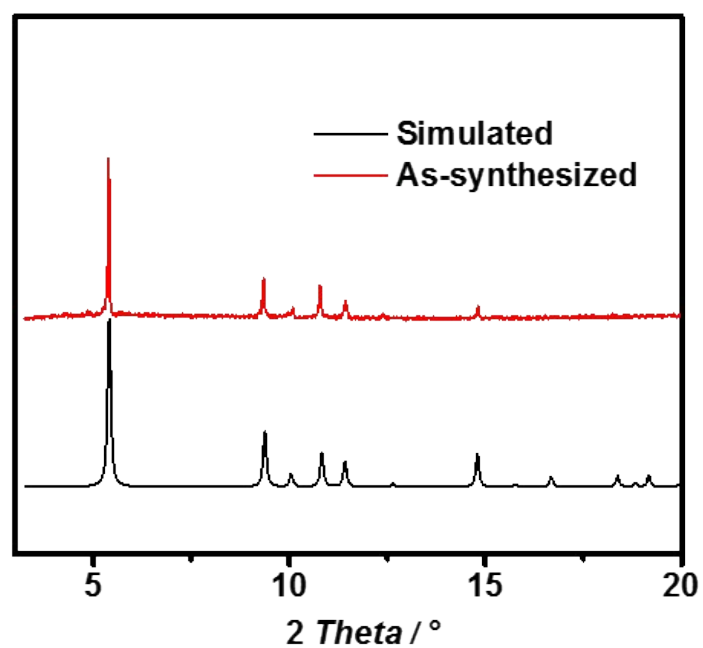

**Fig. S7.** PXRD patterns of Co(DpyDtolP).

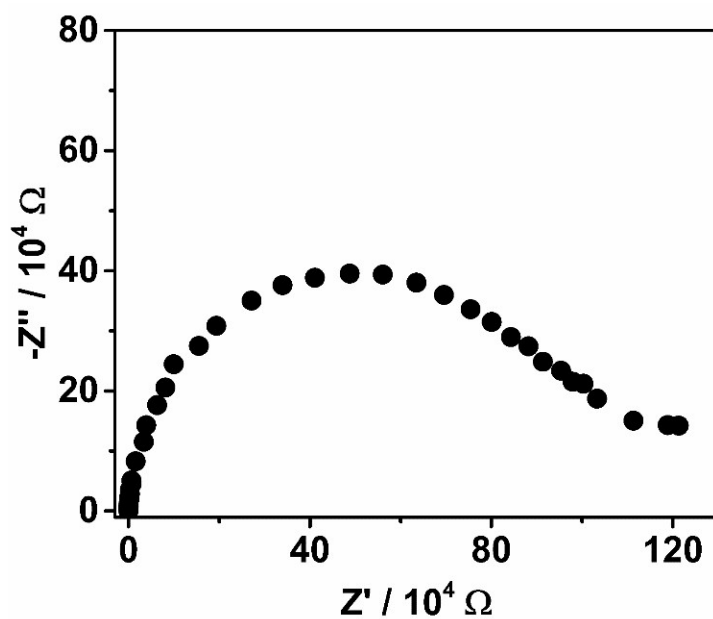

**Fig. S8.** Nyquist plot of Co(DpyDtolP) measured at 25 °C and 97% RH.

**Table S2.** Proton conductivities of BUT-83 and Co(DpyDtolP).

| MOF                                      | Conductivity (S cm <sup>-1</sup> ) | <i>T</i> (°C) | RH (%) |
|------------------------------------------|------------------------------------|---------------|--------|
| BUT-83 powder                            | $5.0 \times 10^{-3}$               | 25            | 97     |
| Co(DpyDtolP) powder                      | $4.7 \times 10^{-7}$               | 25            | 97     |
| Co(DpyDtolP) single crystal <sup>7</sup> | $6.4 \times 10^{-7}$               | RT            | –      |

**Table S3.** Proton conductivities ( $> 10^{-2} \text{ S cm}^{-1}$ ) of selected MOFs.

| Compounds                                                                               | Conductivity ( $\text{S cm}^{-1}$ ) | T ( $^{\circ}\text{C}$ ) | RH (%) | Ref.      |
|-----------------------------------------------------------------------------------------|-------------------------------------|--------------------------|--------|-----------|
| UiO-66(-SO <sub>3</sub> H) <sub>2</sub>                                                 | $8.4 \times 10^{-2}$                | 80                       | 90     | 8         |
| TfOH@MIL-101                                                                            | $8 \times 10^{-2}$                  | 60                       | 15     | 9         |
| Fe-CAT-5                                                                                | $5 \times 10^{-2}$                  | 25                       | 98     | 10        |
| $[(\text{Me}_2\text{NH}_2)_3(\text{SO}_4)]_2[\text{Zn}_2(\text{ox})_3]_n$               | $4.2 \times 10^{-2}$                | 80                       | 95     | 11        |
| BUT-83                                                                                  | $3.9 \times 10^{-2}$                | 80                       | 97     | This work |
| PCMOF-10                                                                                | $3.55 \times 10^{-2}$               | 70                       | 95     | 12        |
| VNU-15                                                                                  | $2.90 \times 10^{-2}$               | 95                       | 60     | 13        |
| $\text{H}^+@\text{Ni}_2(\text{dobdc})(\text{H}_2\text{O})_2$ (pH = 1.8)                 | $2.2 \times 10^{-2}$                | 80                       | 95     | 14        |
| PCMOF2 <sup>1/2</sup>                                                                   | $2.1 \times 10^{-2}$                | 85                       | 90     | 15        |
| $[\text{ImH}][\text{Cu}(\text{HPO}_4)_{1.5}(\text{HPO}_4)_{0.5} \cdot \text{Cl}_{0.5}]$ | $2.0 \times 10^{-2}$                | 130                      | 0      | 16        |
| HOF-GS-11                                                                               | $1.8 \times 10^{-2}$                | 30                       | 95     | 17        |
| $\text{H}_3\text{PO}_4@\text{MIL}-101$                                                  | $1.0 \times 10^{-2}$                | 140                      | 1.1    | 18        |
| $\text{H}_2\text{SO}_4@\text{MIL}-101$                                                  | $1.0 \times 10^{-2}$                | 150                      | 0.13   | 18        |
| $\text{CsHSO}_4@\text{Cr-MIL}-101$                                                      | $10^{-2}$                           | 200                      | 0      | 19        |



## VII. References

1. CrysAlis RED, version 1.171.32.38, SCALE3 ABSPACK Scaling Algorithm; Oxford Diffraction: Blacksburg, VA, USA, 2013.
2. G. M. Sheldrick, SHELXTL NT Version 5.1, Program for Solution and Refinement of Crystal Structures; University of Göttingen: Göttingen, Germany, 1997.
3. A. Spek, *J. Appl. Crystallogr.*, 2003, **36**, 7.
4. X. Liang, F. Zhang, W. Feng, X. Zou, C. Zhao, H. Na, C. Liu, F. Sun and G. Zhu, *Chem. Sci.*, 2013, **4**, 983.
5. Q. Yang, S. Vaesen, F. Ragon, A. D. Wiersum, D. Wu, A. Lago, T. Devic, C. Martineau, F. Taulelle, P. L. Llewellyn, H. Jobic, C. Zhong, C. Serre, G. De Weireld and G. Maurin, *Angew. Chem. Int. Ed.*, 2013, **52**, 10316.
6. S. Biswas, T. Ahnfeldt and N. Stock, *Inorg. Chem.*, 2011, **50**, 9518.
7. S.-H. Chae, H.-C. Kim, Y.-S. Lee, S. Huh, S.-J. Kim, Y. Kim and S.-J. Lee, *Cryst. Growth Des.*, 2015, **15**, 268.
8. W. Phang, H. Jo, W. Lee, J. Song, K. Yoo, B. Kim and C. Hong, *Angew. Chem. Int. Ed.*, 2015, **54**, 5142.
9. D. N. Dybtsev, V. G. Ponomareva, S. B. Aliev, A. P. Chupakhin, M. R. Gallyamov, N. K. Moroz, B. A. Kolesov, K. A. Kovalenko, E. S. Shutova and V. P. Fedin, *ACS Appl. Mater. Interfaces*, 2014, **6**, 5161.
10. N. T. Nguyen, H. Furukawa, F. Gandara, C. A. Trickett, H. M. Jeong, K. E. Cordova, and O. M. Yaghi, *J. Am. Chem. Soc.*, 2015, **137**, 15394.
11. S. S. Nagarkar, S. M. Unni, A. Sharma, S. Kurungot and S. K. Ghosh, *Angew. Chem. Int. Ed.*, 2014, **53**, 2638.
12. P. Ramaswamy, N. E. Wong, B. S. Gelfand and G. K. Shimizu, *J. Am. Chem. Soc.*, 2015, **137**, 7640.

13. T.-N. Tu, N. Q. Phan, T.-T. Vu, H. L. Nguyen, K. E. Cordova and H. Furukawa, *J. Mater. Chem. A*, 2016, **4**, 3638.
14. W. J. Phang, W. R. Lee, K. Yoo, D. W. Ryu, B. Kim and C. S. Hong, *Angew. Chem. Int. Ed.*, 2014, **53**, 8383.
15. S. Kim, K. W. Dawson, B. S. Gelfand, J. M. Taylor and G. K. Shimizu, *J. Am. Chem. Soc.*, 2013, **135**, 963.
16. S. Horike, W. Chen, T. Itakura, M. Inukai, D. Umeyama, H. Asakura and S. Kitagawa, *Chem. Commun.*, 2014, **50**, 10241.
17. A. Karmakar, R. Illathvalappil, B. Anothumakkool, A. Sen, P. Samanta, A. V. Desai, S. Kurungot and S. K. Ghosh, *Angew. Chem. Int. Ed.*, 2016, **55**, 10667.
18. V. G. Ponomareva, K. A. Kovalenko, A. P. Chupakhin, D. N. Dybtsev, E. S. Shutova and V. P. Fedin, *J. Am. Chem. Soc.*, 2012, **134**, 15640.
19. V. G. Ponomareva, K. A. Kovalenko, A. P. Chupakhin, E. S. Shutova and V. P. Fedin, *Solid State Ionics*, 2012, **225**, 420.
